# Supplementary material
Source: publisher site journal article supplement (https://www.dovepress.com/article/465417)
Supplement: Supplementary file 1 [file get_supplementary_file.php]

**Supplementary Table 1. Stratified analysis by surgery type for effects of FSN treatment on pain measurement, inflammatory biomarkers, and muscle hardness.**

| Outcome Measure                 | Discectomy    |                  |                  | Fusion        |                 |                  |
|---------------------------------|---------------|------------------|------------------|---------------|-----------------|------------------|
|                                 | FSN (n = 15)  | Control (n = 15) | P-value          | FSN (n = 10)  | Control (n = 9) | P-value          |
| <b>Pain measurement</b>         |               |                  |                  |               |                 |                  |
| <b>Pain intensity (0-10)</b>    |               |                  |                  |               |                 |                  |
| Before                          | 6.83 ± 1.44   | 6.53 ± 1.80      | 0.601            | 6.75 ± 1.50   | 8.11 ± 0.89     | <b>0.010</b>     |
| 1 hour                          | 5.63 ± 0.81   | 6.9 ± 1.63       | <b>0.005</b>     | 5.55 ± 1.40   | 7.17 ± 1.30     | <b>0.006</b>     |
| 24 hours                        | 3.97 ± 1.08   | 5.37 ± 1.82      | <b>0.008</b>     | 3.85 ± 1.18   | 5.94 ± 1.94     | <b>0.003</b>     |
| 48 hours                        | 3.13 ± 1.45   | 4.13 ± 1.17      | <b>0.031</b>     | 3.20 ± 0.95   | 4.78 ± 1.12     | <b>&lt;0.001</b> |
| 72 hours                        | 2.60 ± 1.12   | 3.17 ± 0.96      | 0.123            | 2.45 ± 0.60   | 4.33 ± 1.46     | <b>&lt;0.001</b> |
| <b>Pain interference (0-10)</b> |               |                  |                  |               |                 |                  |
| Before                          | 5.47 ± 2.22   | 5.67 ± 2.30      | 0.802            | 5.40 ± 1.88   | 7.06 ± 1.40     | <b>0.021</b>     |
| 1 hour                          | 4.00 ± 1.10   | 5.30 ± 1.37      | <b>0.003</b>     | 3.95 ± 1.12   | 4.78 ± 1.33     | 0.122            |
| 24 hours                        | 3.43 ± 1.15   | 4.13 ± 1.45      | 0.128            | 3.20 ± 1.23   | 4.44 ± 1.78     | 0.063            |
| 48 hours                        | 2.50 ± 0.76   | 3.17 ± 1.19      | 0.058            | 2.50 ± 0.78   | 3.67 ± 0.83     | <b>&lt;0.001</b> |
| 72 hours                        | 2.10 ± 0.76   | 2.40 ± 0.76      | 0.264            | 2.30 ± 0.63   | 3.44 ± 1.24     | <b>0.008</b>     |
| <b>ODI (%)</b>                  |               |                  |                  |               |                 |                  |
| Before                          | 51.66 ± 13.24 | 45.48 ± 16.61    | 0.244            | 53.78 ± 20.28 | 65.43 ± 14.15   | 4.446            |
| 72 hours                        | 32.59 ± 9.45  | 37.48 ± 4.35     | 0.060            | 40.22 ± 11.06 | 47.9 ± 16.52    | 5.192            |
| 1 month                         | 21.39 ± 15.5  | 19.26 ± 7.35     | 0.618            | 18.67 ± 10.43 | 18.52 ± 7.45    | 2.342            |
| 2 months                        | 12.62 ± 13.84 | 12.89 ± 5.39     | 0.943            | 9.11 ± 8.14   | 14.07 ± 5.56    | 1.746            |
| 3 months                        | 7.91 ± 13     | 6.03 ± 4.24      | 0.581            | 4.44 ± 6.87   | 9.26 ± 7.58     | 2.381            |
| <b>Muscle Hardness</b>          |               |                  |                  |               |                 |                  |
| <b>Latissimus dorsi muscle</b>  |               |                  |                  |               |                 |                  |
| Before                          | 71.53 ± 8.18  | 63.74 ± 8.20     | <b>0.007</b>     | 61.49 ± 7.52  | 58.63 ± 7.50    | 0.381            |
| 1 hour                          | 59.81 ± 8.78  | 64.92 ± 7.91     | 0.083            | 65.90 ± 5.51  | 63.88 ± 7.60    | 0.489            |
| 24 hours                        | 60.96 ± 9.01  | 66.59 ± 5.66     | <b>0.034</b>     | 57.63 ± 3.20  | 65.30 ± 9.67    | <b>0.016</b>     |
| 48 hours                        | 55.60 ± 8.19  | 66.19 ± 6.34     | <b>&lt;0.001</b> | 54.26 ± 8.41  | 67.41 ± 9.55    | <b>0.001</b>     |
| 72 hours                        | 52.84 ± 11.00 | 64.69 ± 8.20     | <b>0.001</b>     | 50.37 ± 7.08  | 60.48 ± 9.82    | <b>0.007</b>     |
| <b>L3 paraspinal muscle</b>     |               |                  |                  |               |                 |                  |
| Before                          | 61.31 ± 8.53  | 63.01 ± 9.78     | 0.601            | 63.41 ± 10.63 | 50.91 ± 8.91    | <b>0.003</b>     |
| 1 hour                          | 54.64 ± 10.16 | 60.17 ± 7.44     | 0.078            | 61.40 ± 12.94 | 56.78 ± 8.56    | 0.328            |
| 24 hours                        | 52.61 ± 9.06  | 59.70 ± 7.89     | <b>0.018</b>     | 50.46 ± 7.85  | 51.42 ± 11.45   | 0.824            |
| 48 hours                        | 52.74 ± 11.41 | 62.17 ± 6.67     | <b>0.004</b>     | 50.11 ± 8.64  | 57.83 ± 11.69   | 0.086            |
| 72 hours                        | 45.53 ± 5.49  | 60.57 ± 8.23     | <b>&lt;0.001</b> | 47.35 ± 9.87  | 55.47 ± 13.26   | 0.112            |
| <b>Gluteus maximus muscle</b>   |               |                  |                  |               |                 |                  |
| Before                          | 54.39 ± 11.68 | 54.51 ± 10.38    | 0.974            | 55.03 ± 10.33 | 50.94 ± 12.89   | 0.423            |
| 1 hour                          | 53.87 ± 9.75  | 59.07 ± 6.24     | 0.071            | 57.28 ± 5.02  | 52.86 ± 5.54    | 0.055            |
| 24 hours                        | 52.50 ± 6.26  | 60.70 ± 7.59     | <b>0.001</b>     | 49.60 ± 6.98  | 54.75 ± 12.50   | 0.247            |

|                                   |                              |                              |                  |                              |                              |       |
|-----------------------------------|------------------------------|------------------------------|------------------|------------------------------|------------------------------|-------|
| 48 hours                          | 48.70 ± 9.10                 | 59.59 ± 9.09                 | <b>0.001</b>     | 48.51 ± 8.34                 | 56.55 ± 13.08                | 0.095 |
| 72 hours                          | 44.42 ± 8.91                 | 57.66 ± 10.11                | <b>&lt;0.001</b> | 45.90 ± 6.74                 | 49.72 ± 14.69                | 0.448 |
| <b>Inflammatory biomarkers</b>    |                              |                              |                  |                              |                              |       |
| <b>C-reactive protein (ng/ml)</b> |                              |                              |                  |                              |                              |       |
| Before                            | 937.02<br>(645.68-2703.66)   | 1637.05<br>(1132.94-3745.58) | 0.229            | 1142.42<br>(146.62-3218.37)  | 2099.58<br>(761.51-4140.55)  | 0.713 |
| 24 hours                          | 4679.40<br>(3569.90-4910.08) | 5134.59<br>(4378.74-5447.67) | 0.038            | 5293.97<br>(4689.39-5511.02) | 5337.37<br>(5153.10-5668.81) | 0.488 |
| 72 hours                          | 4437.67<br>(3011.49-5249.89) | 4499.56<br>(4164.17-5350.16) | 0.481            | 5369.80<br>(5319.41-5460.12) | 5503.59<br>(5157.24-5633.21) | 0.348 |
| 1 month                           | 2096.21<br>(551.86-3602.57)  | 2290.69<br>(726.41-3653.57)  | 0.740            | 1721.88<br>(579.99-3567.69)  | 1578.34<br>(1438.00-3630.25) | 0.775 |
| <b>IL-1β (pg/ml)</b>              |                              |                              |                  |                              |                              |       |
| Before                            | 0.00 (0.00-5.68)             | 3.04 (0.01-5.76)             | 0.269            | 0.32 (0.00-2.58)             | 0.00 (0.00-6.15)             | 1.000 |
| 24 hours                          | 3.68 (0.00-13.92)            | 8.13 (0.84-20.47)            | 0.212            | 12.63 (5.84-21.36)           | 14.77 (11.02-24.54)          | 0.596 |
| 72 hours                          | 6.78 (1.83-12.31)            | 10.46 (0.00-14.01)           | 0.616            | 7.87 (0.51-12.35)            | 7.25 (5.52-11.44)            | 0.967 |
| 1 month                           | 2.18 (0.00-11.15)            | 1.13 (0.22-6.53)             | 0.646            | 2.41 (0.00-5.12)             | 1.47 (0.27-2.17)             | 0.487 |
| <b>IL-2 (pg/ml)</b>               |                              |                              |                  |                              |                              |       |
| Before                            | 1.76 (0.00-3.72)             | 1.98 (1.24-4.27)             | 0.708            | 0.56 (0.00-1.69)             | 2.09 (0.67-3.35)             | 0.101 |
| 24 hours                          | 3.67 (1.71-5.12)             | 3.41 (1.72-5.15)             | 0.803            | 1.78 (1.04-4.11)             | 2.77 (2.01-4.18)             | 0.307 |
| 72 hours                          | 2.74 (0.45-3.70)             | 2.75 (0.97-3.98)             | 0.771            | 1.81 (1.32-2.33)             | 3.02 (1.27-3.68)             | 0.624 |
| 1 month                           | 2.54 (0.92-3.43)             | 2.05 (0.95-4.29)             | 1.000            | 2.34 (1.44-6.25)             | 1.99 (1.45-2.43)             | 0.438 |
| <b>IL-6 (pg/ml)</b>               |                              |                              |                  |                              |                              |       |
| Before                            | 2.38 (0.00-7.13)             | 4.61 (3.27-9.59)             | 0.194            | 4.73 (0.00-10.96)            | 6.41 (1.82-7.32)             | 1.000 |
| 24 hours                          | 9.73 (5.75-18.72)            | 11.03 (6.33-18.98)           | 0.917            | 11.96 (9.57-15.61)           | 9.78 (8.95-11.95)            | 0.253 |
| 72 hours                          | 3.85 (0.00-9.56)             | 2.38 (0.00-11.59)            | 0.767            | 8.60 (5.20-11.63)            | 4.61 (2.30-6.84)             | 0.176 |
| 1 month                           | 8.15 (4.90-15.36)            | 11.20 (6.71-17.53)           | 0.229            | 14.80 (10.06-16.11)          | 8.31 (8.24-18.05)            | 0.391 |
| <b>TNF-α (pg/ml)</b>              |                              |                              |                  |                              |                              |       |
| Before                            | 0.29 (0.00-5.79)             | 0.00 (0.00-5.11)             | 1.000            | 0.00 (0.00-0.36)             | 1.29 (0.00-3.25)             | 0.112 |
| 24 hours                          | 0.58 (0.00-10.91)            | 0.48 (0.00-1.93)             | 0.668            | 2.03 (0.50-4.26)             | 1.04 (0.00-2.38)             | 0.387 |
| 72 hours                          | 0.12 (0.00-3.47)             | 0.00 (0.00-2.03)             | 0.356            | 0.00 (0.00-2.43)             | 0.00 (0.00-0.00)             | 0.255 |
| 1 month                           | 2.44 (0.00-6.40)             | 0.19 (0.00-0.94)             | 0.090            | 0.62 (0.00-3.66)             | 0.64 (0.00-0.96)             | 0.645 |

FSN: Fu's subcutaneous needling group. Control: control group. Before: before operation. 24 hours: 24 hours after operation. 72 hours: 72 hours after operation. Pain measurement and muscle hardness data are expressed as means ± standard deviations (SDs) and analyzed for between-group differences using Student's t-test; Inflammatory biomarkers are expressed as median (25<sup>th</sup> - 75<sup>th</sup> percentile) and were analyzed for between-group differences using Wilcoxon rank sum test and the significant level was 0.0125.

Significant results are shown in bold.
